# Supplementary material for: Exploring the driving factors of compound flood severity in coastal cities: a comprehensive analytical approach
Source: Copernicus journal article supplement (doi:10.5194/hess-28-5541-2024), 2024-12-20
Supplement: Supplementary file 1 [file hess-28-5541-2024-supplement.pdf]

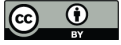

*Supplement of*

## **Exploring the driving factors of compound flood severity in coastal cities: a comprehensive analytical approach**

**Yan Liu et al.**

*Correspondence to:* Ting Zhang (zhangting\_hydro@tju.edu.cn)

The copyright of individual parts of the supplement might differ from the article licence.

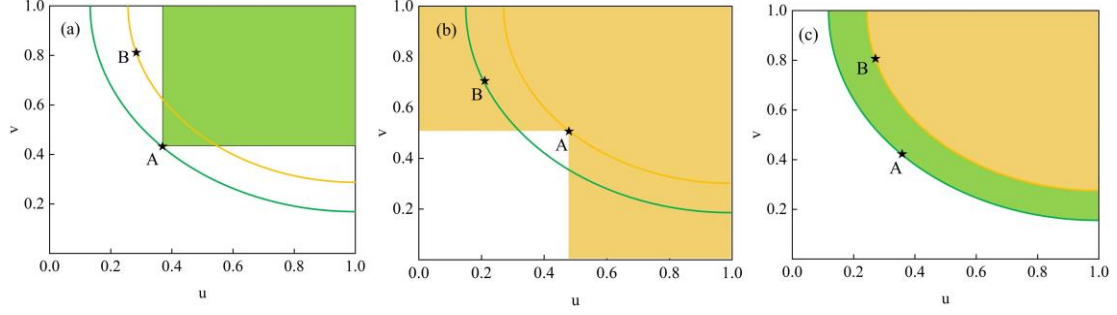

**Figure S1** The schematic diagram of different types of return periods. (a) The green area represents the danger zone for the "And" return period, where point A is located. It's evident that the joint probability at point B is higher than point A, which implies that point B is considered a dangerous event. However, the danger zone doesn't include point B. Therefore, the "And" return period narrows down the danger area. (b) The yellow area corresponds to the danger zone for the "Or" return period. It's noticeable that point B has one variable significantly large while the other one quite small. In engineering applications, this might not be considered as a significant risk. Nevertheless, in the "Or" return period, point B is included in the danger zone. (c) A curve  $C(u,v)=p$  divides the event domain into safe and dangerous areas. The yellow dangerous area is included in the green range. The bivariate return period under the condition  $C(u,v)=p$  can be called "Kendall" return period.

### S1 The design of tide level process

The design of tide level process is typically created using the equal-multiple method. However, when the typical tide level processes contain negative value, the magnification factor tends to lower the low tide levels, which leads to an exaggerated tide level range. In this study, a modified equal-multiple method is employed to design the tide level process. Firstly, a typical tide level event is selected based on an extensive dataset of tide level observations. Then, the design tide level process is calculated according to the following formula while controlling for the high tide levels:

$$\begin{cases} Z_i \geq \bar{Z}, & Z_{p,i} = (Z_i - \bar{Z}) \times k_{p,1} + \bar{Z} \\ Z_i < \bar{Z}, & Z_{p,i} = Z_i \times k_{p,2} + Z_i \end{cases} \quad (S1)$$

$$k_{p,1} = \frac{Z_p}{Z_{\max}} \quad (S2)$$

$$k_{p,2} = \frac{Z_{\min}}{Z_p} \quad (S3)$$

where  $Z_i$  represents the typical tide level at time  $i$ ;  $\bar{Z}$  is the average tide level of the typical tide level process;  $Z_{p,i}$  is the designed tide level at time  $i$  for the  $p$  frequency;

$k_{p,1}$  is the ratio of the designed high tide level to the typical tide level for the  $p$  frequency;  $k_{p,2}$  is the ratio of the typical tide level to the designed tide level for the  $p$  frequency;  $Z_{max}$  is the maximum tide level value in the typical tide level pattern;  $Z_{min}$  is the minimum tide level value in the typical tide level pattern;  $Z_p$  represents the designed tide level.

The above method may result in differences between the maximum value and the design values. Therefore, further adjustments are made to the designed tide process to obtain the final design tide level process.

$$k = \frac{Z_p}{\max(Z_{p,i})} \quad (S4)$$

$$Z'_{p,i} = k Z_{p,i} \quad (S5)$$

where  $k$  is the correction coefficient, and  $Z'_{p,i}$  is the final designed process.

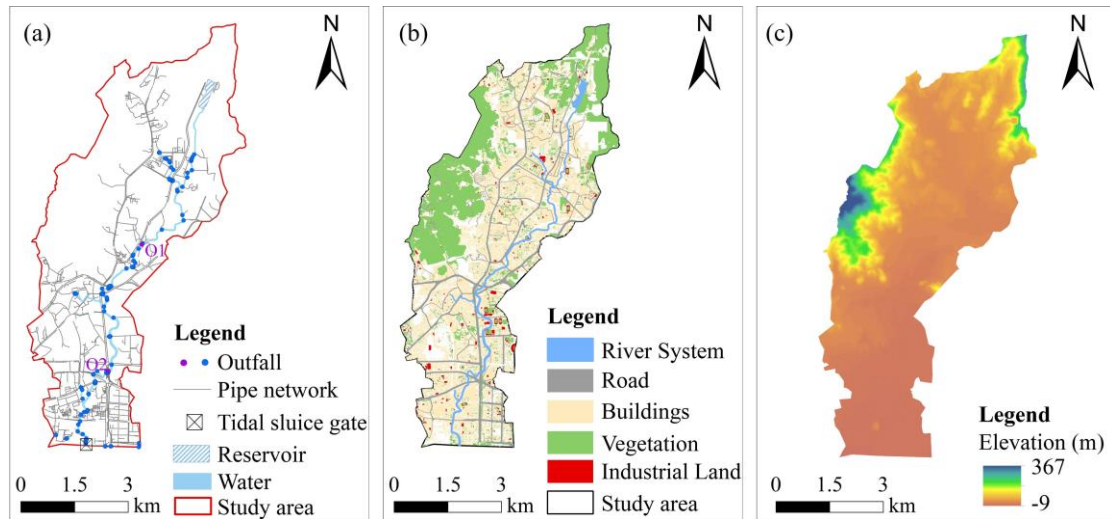

**Figure S2** Model construction.

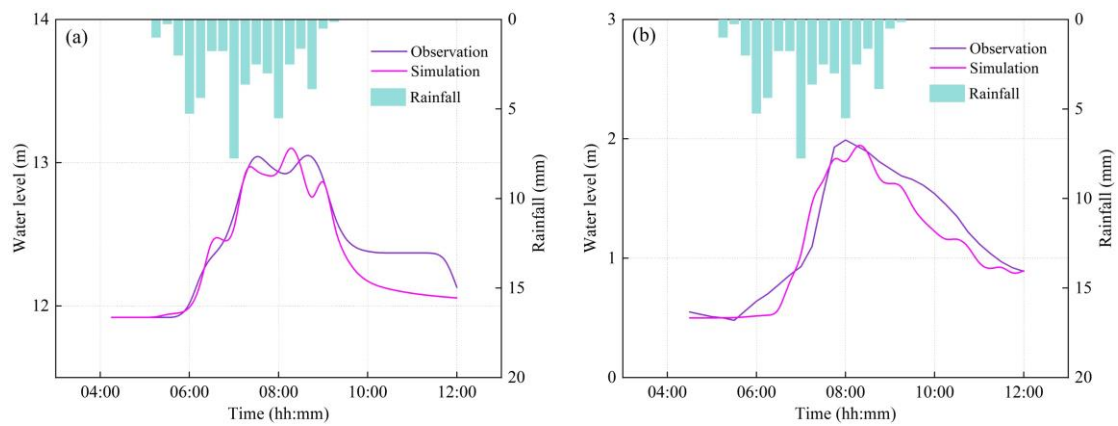

**Figure S3** Comparison of observed and simulated water levels at two monitoring points: (a) L1 for manhole level; (b) L2 for river level.

## S2 The design of tide level process

Considering the topography of the watershed and in combination with the direction of the drainage network, the drainage units are divided. The outlet number data from urban drainage network data are recorded in the outlet number set. The first inspection well number  $Y_i$  is searched upstream of the outlet number  $O_i$ , and then the pipelines with  $Y_i$  as the downstream inspection well are searched. The search results are checked for null values. If they are null, the search for the outlet  $O_i$  is completed, and the process proceeds to the next outlet. All the inspection wells, pipeline segments, and sub-watersheds upstream of the outlet form a drainage unit. The main drainage channels of the drainage network along the river and their inspection wells are assigned to various adjacent drainage units.

**Table S1** The goodness-of-fit test for the marginal distribution functions

| Durations (h) | Marginal distributions | Rainfall     |                |                |              | Tide level   |               |               |              |
|---------------|------------------------|--------------|----------------|----------------|--------------|--------------|---------------|---------------|--------------|
|               |                        | RMSE         | AIC            | BIC            | K-S          | RMSE         | AIC           | BIC           | K-S          |
| 1             | GEV                    | <b>0.035</b> | <b>335.690</b> | <b>341.303</b> | <b>0.104</b> | 0.026        | 49.299        | 54.912        | 0.083        |
|               | Norm                   | 0.093        | 357.198        | 360.940        | 0.188        | 0.590        | 49.716        | 53.458        | 1.000        |
|               | Gamma                  | 0.082        | 350.256        | 353.998        | 0.188        | <b>0.026</b> | <b>47.079</b> | <b>50.821</b> | <b>0.083</b> |
|               | Weibull                | 0.099        | 364.278        | 368.020        | 0.188        | 0.035        | 50.007        | 53.750        | 0.083        |
| 3             | GEV                    | <b>0.037</b> | <b>325.464</b> | <b>330.454</b> | <b>0.103</b> | 0.044        | 41.501        | 46.492        | 0.128        |
|               | Norm                   | 0.082        | 345.930        | 349.257        | 0.154        | 0.591        | 42.596        | 45.923        | 1.000        |
|               | Gamma                  | 0.066        | 336.618        | 339.945        | 0.128        | <b>0.045</b> | <b>39.488</b> | <b>42.815</b> | <b>0.128</b> |
|               | Weibull                | 0.090        | 351.458        | 354.786        | 0.205        | 0.048        | 42.871        | 46.198        | 0.128        |
| 6             | GEV                    | <b>0.031</b> | <b>437.009</b> | <b>442.685</b> | <b>0.122</b> | 0.050        | 56.114        | 61.790        | 0.122        |
|               | Norm                   | 0.086        | 460.232        | 464.016        | 0.163        | 0.588        | 54.676        | 58.460        | 1.000        |
|               | Gamma                  | 0.066        | 449.016        | 452.799        | 0.122        | 0.054        | 54.531        | 58.314        | 0.102        |
|               | Weibull                | 0.086        | 462.671        | 466.455        | 0.163        | <b>0.043</b> | <b>54.200</b> | <b>57.984</b> | <b>0.122</b> |
| 12            | GEV                    | <b>0.025</b> | <b>449.977</b> | <b>455.653</b> | <b>0.082</b> | 0.061        | 64.034        | 69.709        | 0.143        |
|               | Norm                   | 0.111        | 485.466        | 489.249        | 0.224        | 0.587        | 62.417        | 66.200        | 1.000        |
|               | Gamma                  | 0.090        | 471.221        | 475.005        | 0.184        | 0.069        | 62.773        | 66.557        | 0.122        |
|               | Weibull                | 0.108        | 485.460        | 489.244        | 0.224        | <b>0.054</b> | <b>61.608</b> | <b>65.392</b> | <b>0.143</b> |
| 24            | GEV                    | <b>0.031</b> | <b>491.344</b> | <b>497.198</b> | <b>0.077</b> | 0.059        | 71.614        | 77.468        | 0.154        |
|               | Norm                   | 0.124        | 533.271        | 537.173        | 0.231        | 0.588        | 72.491        | 76.393        | 1.000        |
|               | Gamma                  | 0.106        | 517.973        | 521.876        | 0.212        | <b>0.058</b> | <b>69.048</b> | <b>72.951</b> | <b>0.154</b> |
|               | Weibull                | 0.118        | 532.585        | 536.487        | 0.212        | 0.054        | 73.716        | 77.619        | 0.173        |

**Table S2** The goodness-of-fit test for the joint distribution functions of rainfall and tide level

| Durations (h) | Copula   | RMSE         | AIC           | BIC          | K-S          |
|---------------|----------|--------------|---------------|--------------|--------------|
| 1             | Gaussian | 0.035        | -0.041        | 1.830        | 0.125        |
|               | t        | 0.035        | 3.956         | 9.570        | 0.125        |
|               | Frank    | 0.035        | -0.161        | 1.710        | 0.125        |
|               | Gumbel   | <b>0.036</b> | <b>-1.004</b> | <b>0.867</b> | <b>0.125</b> |
| 3             | Gaussian | 0.041        | 0.711         | 2.663        | 0.154        |
|               | t        | 0.041        | 1.751         | 7.605        | 0.154        |
|               | Frank    | <b>0.041</b> | <b>0.312</b>  | <b>2.264</b> | <b>0.154</b> |
|               | Gumbel   | 0.044        | 0.860         | 2.811        | 0.154        |
| 6             | Gaussian | <b>0.036</b> | <b>-0.793</b> | <b>1.099</b> | <b>0.122</b> |
|               | t        | 0.035        | 3.207         | 8.883        | 0.122        |
|               | Frank    | 0.038        | 0.352         | 2.244        | 0.143        |
|               | Gumbel   | 0.038        | -0.080        | 1.812        | 0.163        |
| 12            | Gaussian | <b>0.044</b> | <b>1.225</b>  | <b>3.117</b> | <b>0.143</b> |
|               | t        | 0.045        | 4.736         | 10.411       | 0.163        |
|               | Frank    | 0.045        | 1.643         | 3.535        | 0.163        |
|               | Gumbel   | 0.045        | 1.691         | 3.582        | 0.184        |
| 24            | Gaussian | 0.043        | 0.711         | 2.663        | 0.154        |
|               | t        | 0.043        | 1.751         | 7.605        | 0.173        |
|               | Frank    | <b>0.043</b> | <b>0.312</b>  | <b>2.264</b> | <b>0.154</b> |
|               | Gumbel   | 0.044        | 0.860         | 2.811        | 0.154        |

**Table S3** Comparison of different types of return period

| RP (yr) | Rainfall (mm) | Tide level(m) | Or (yr) | And (yr) | Kendall (yr) |
|---------|---------------|---------------|---------|----------|--------------|
| 2       | 98.90         | 1.45          | 1.40    | 3.52     | 2.42         |
| 3       | 111.20        | 1.65          | 1.89    | 7.21     | 4.55         |
| 5       | 129.84        | 1.87          | 2.90    | 18.22    | 10.62        |
| 10      | 163.66        | 2.12          | 5.40    | 66.88    | 36.35        |
| 20      | 211.95        | 2.34          | 10.41   | 254.82   | 133.11       |
| 50      | 310.17        | 2.60          | 25.41   | 1543.63  | 785.87       |
| 100     | 424.12        | 2.79          | 50.41   | 6108.23  | 3082.09      |
| 200     | 589.74        | 2.97          | 100.41  | 24299.60 | 12205.61     |

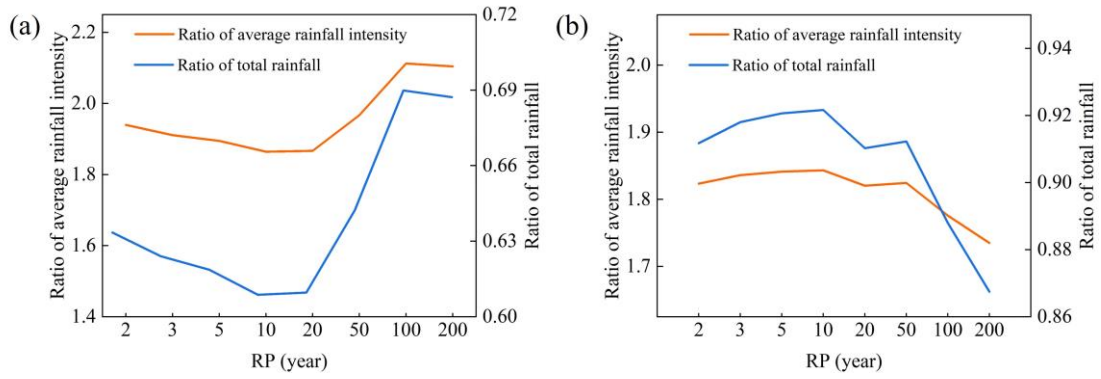

**Figure S4** Comparison of rainfall characteristics. The ratio of 1-h duration to 3-h duration (a) and the ratio of 6-h duration to 12-h duration (b).

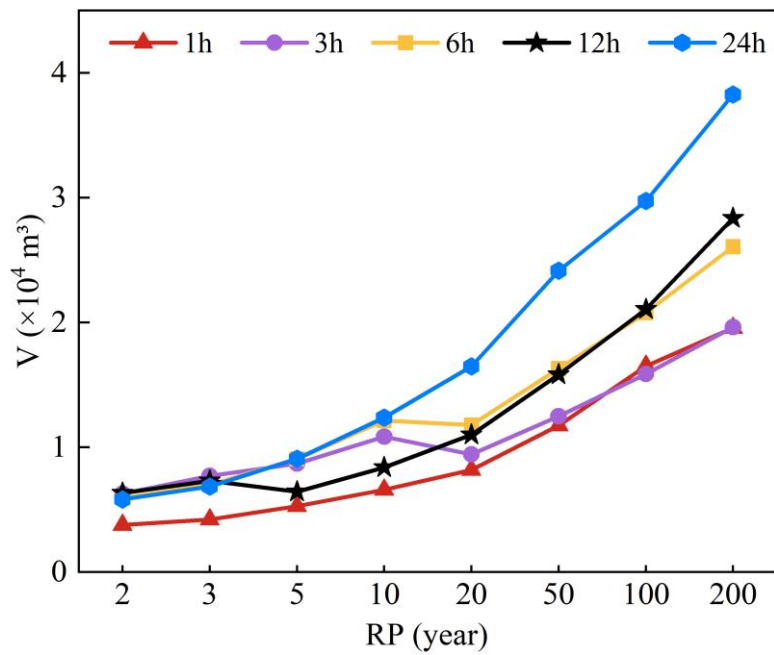

**Figure S5** Comparison of flood volumes with different return periods and durations.

**Table S4** Tidal sluice gate opening time

| Durations (h) | 1 | 3    | 6    | 12   | 24    |
|---------------|---|------|------|------|-------|
| 2-yr RP       | / | /    | 3:00 | 5:00 | 10:00 |
| 3-yr RP       | / | /    | 3:00 | 5:00 | 10:00 |
| 5-yr RP       | / | /    | 3:00 | 4:00 | 10:00 |
| 10-yr RP      | / | /    | 3:00 | 4:00 | 10:00 |
| 20-yr RP      | / | 2:00 | 2:00 | 4:00 | 10:00 |
| 50-yr RP      | / | 2:00 | 2:00 | 4:00 | 10:00 |
| 100-yr RP     | / | 2:00 | 2:00 | 4:00 | 10:00 |
| 200-yr RP     | / | 2:00 | 2:00 | 4:00 | 6:00  |

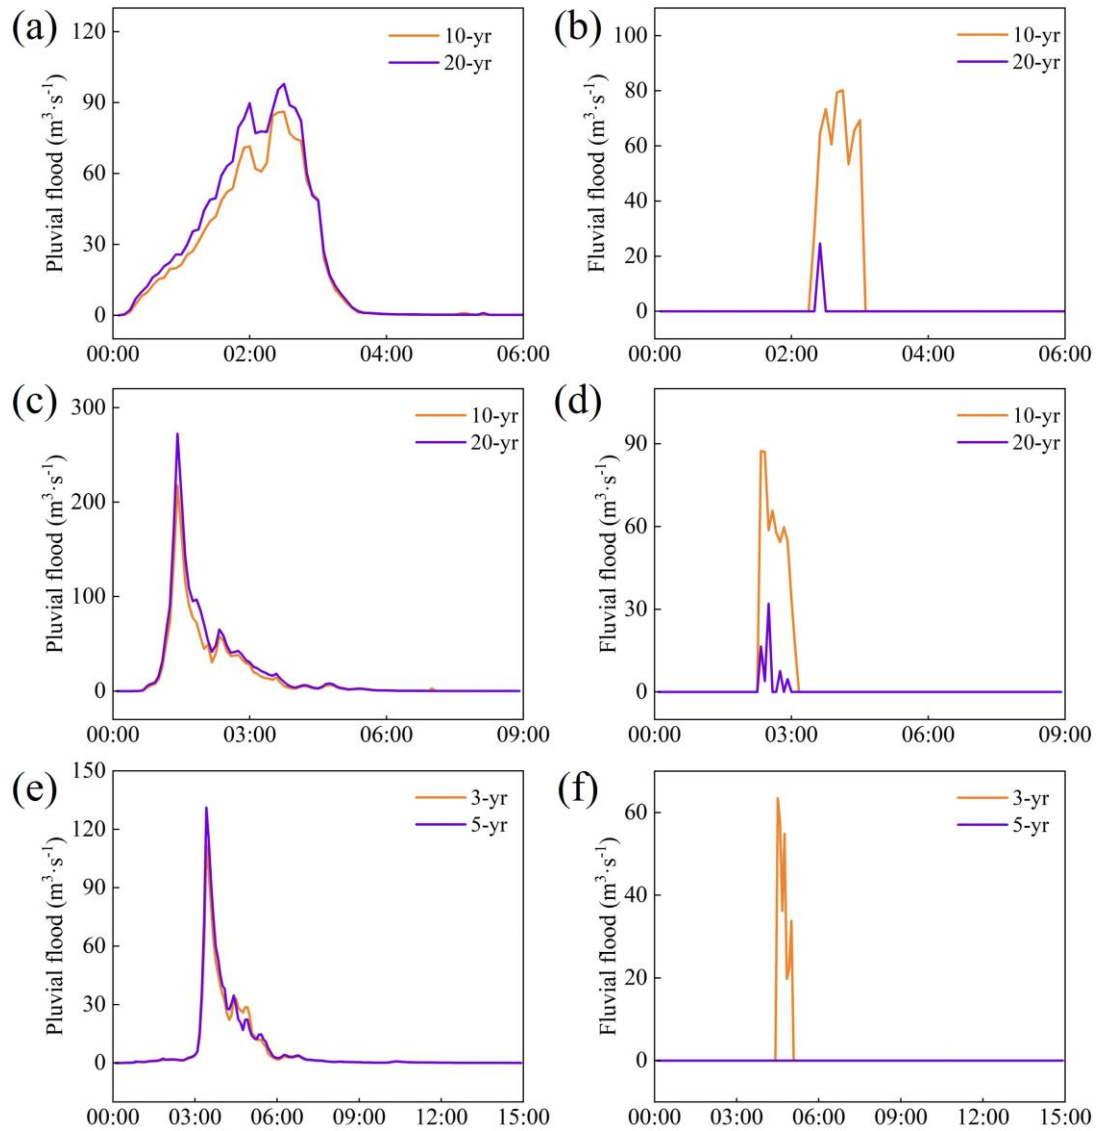

**Figure S6** Comparison of flood processes with different return periods and different durations. The rainfall lasted for 3 h (a and b). The rainfall lasted for 6 h (c and d). The rainfall lasted for 12 h (e and f). The return periods are shown in the legend.
